# Supplementary material for: Quantitation of MicroRNA-155 in Human Cells by Heterogeneous Enzyme-Linked Oligonucleotide Assay Coupled with Mismatched Catalytic Hairpin Assembly Reaction
Source: MDPI journal article supplement (doi:10.3390/bios12080570), 2022-07-26
Supplement: s1 [file s1]

# Quantitation of MicroRNA-155 in Human Cells by Heterogeneous Enzyme-Linked Oligonucleotide Assay Coupled with Mismatched Catalytic Hairpin Assembly Reaction

Oleg L. Bodulev <sup>1</sup>, Ivan I. Galkin <sup>2</sup>, Shulin Zhao <sup>3</sup>, Olga Y. Pletyushkina <sup>2</sup> and Ivan Y. Sakharov <sup>1,\*</sup>

<sup>1</sup> Department of Chemistry, Lomonosov Moscow State University, Leninskie Gory, bldg.1, 119991 Moscow, Russia; bodulevoleg@mail.ru

<sup>2</sup> A.N. Belozersky Research Institute of Physico-Chemical Biology, Lomonosov Moscow State University, Leninskie Gory, bldg.1, 119992 Moscow, Russia; ddeathseller@gmail.com (I.I.G.); pletjush@genebee.msu.ru (O.Y.P.)

<sup>3</sup> State Key Laboratory for the Chemistry and Molecular Engineering of Medicinal Resources, Guangxi Normal University, Guilin 541004, China; zhaoshulin001@163.com

\* Correspondence: sakharovivan@gmail.com; Tel.: +7-495-939-3407

**Table S1.** The list of oligonucleotides used in this work (5'-3').

|                                                                                     |                                                             |
|-------------------------------------------------------------------------------------|-------------------------------------------------------------|
| Flu-HP1<br>(for microRNA-155 detection)<br>(6-carboxyfluorescein-labeled hairpin 1) | GTGATAGGGGTGACCGTAGATAATCGT<br>CACCCCTATCACGATTAGCATTA-FAM  |
| B-HP2<br>(for microRNA-155 detection)<br>(biotinylated hairpin 2)                   | CGTAGATAATCGTCTTAGGGG<br>TGACGATTATCTACGGTCACCC- biotin     |
| Flu-HP1<br>(for microRNA-39 detection)                                              | TGTAAATCAGCTTGATGATATTG<br>GGTGTCAAGCTGATTTACACCCGGTGA- FAM |
| B-HP2<br>(for microRNA-39 detection)                                                | ATGATATTGGGTGTTTATCAGCTTG<br>ACACCCAATATCATCAAGCTG-biotin   |
| microRNA-141                                                                        | UAACACUGUCUGGUAAGAUGG                                       |
| microRNA-319a                                                                       | UUGGACUGAAGGGUGCUC                                          |
| microRNA-21                                                                         | UAGCUUAUCAGACUGAUGUUGA                                      |
| microRNA-205                                                                        | UCCUUCAUCCACCGGAGUCUG                                       |
| microRNA-155                                                                        | UUAAUGCUAAUCGUGAUGGGGUU                                     |
| microRNA-39                                                                         | UCACCGGGUGUAAAUCAGCUUG                                      |

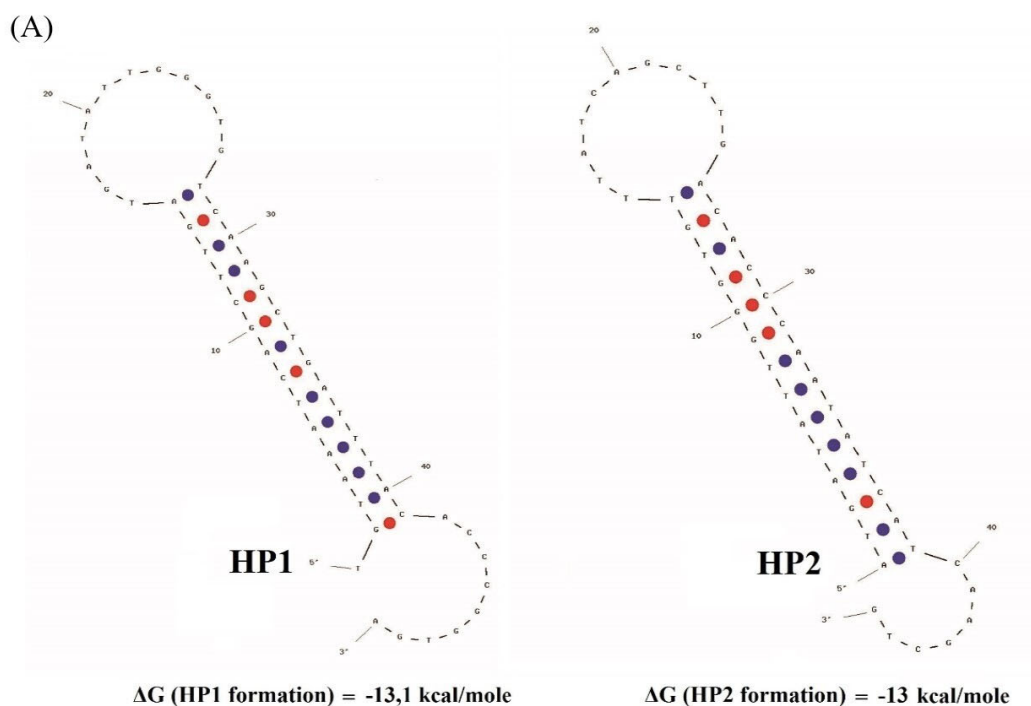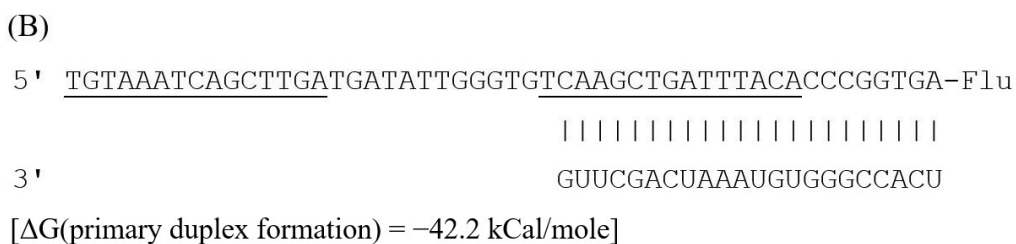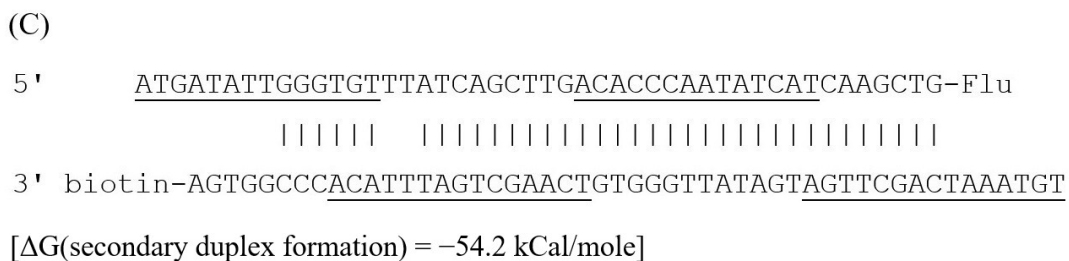

**Figure S1.** Secondary structures of (A) the hairpins used in chemiluminescent heterogenous mCHA-based microRNA-39 assay, (B) Flu-HP1- microRNA-39, (C) Flu-HP1- B-HP2 duplexes and  $\Delta G$  values of their formation. Underlined nucleotides are involved in stem of a hairpin structures. Modeling of the hairpin structures and  $\Delta G$  assessment were performed using OligoAnalyzer 3.1 software.

## Optimization of the Assay Conditions for MicroRNA-39 Detection

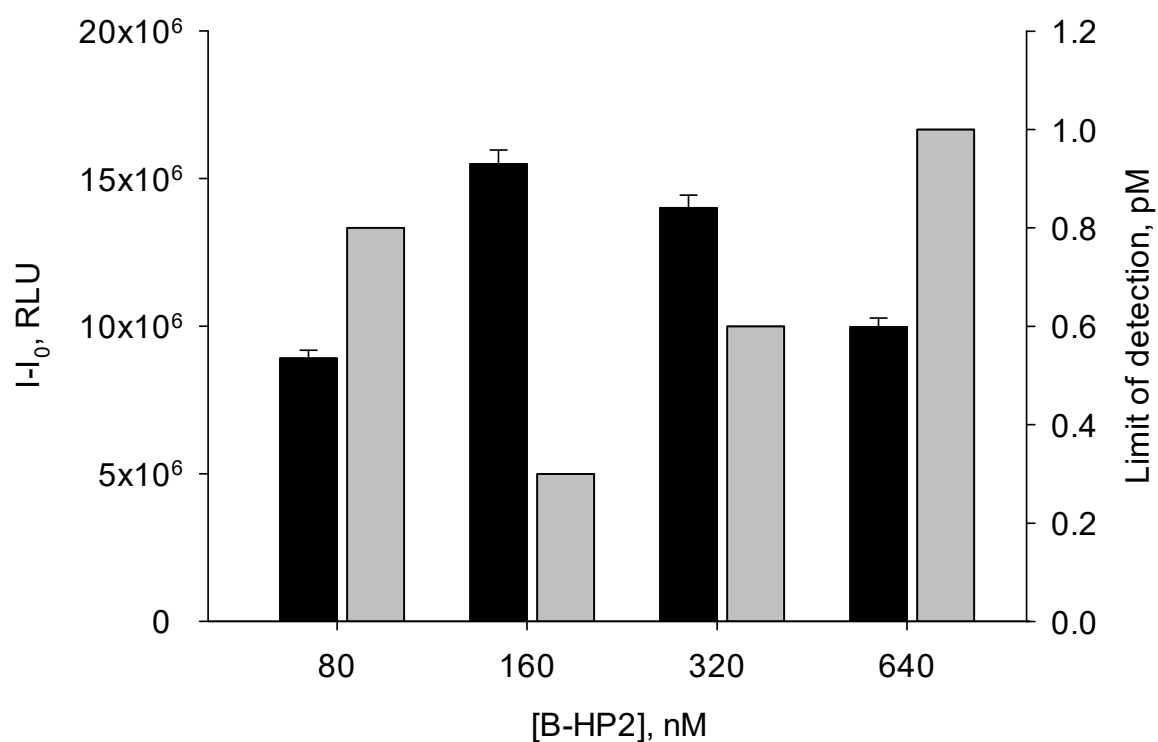

**Figure S2.** Effect of the B-HP2 probe concentration in the reaction solution on (A) behavior of the calibration curves, (B) chemiluminescence signal ( $I - I_0$ ) (black columns) and limit of detection (gray columns) of the amplified microRNA-39 assay. The mismatched catalytic hairpin assembly reaction was carried out in 10 mM Tris-HCl with pH 7.2 containing 20 mM MgCl<sub>2</sub> at 25°C for 1 h. The concentration of the B-HP2 probe was (a) 80, (b) 160, (c) 320 and (d) 640 mM. The value of chemiluminescence signal ( $I - I_0$ ) was calculated as a difference between the chemiluminescence intensities recorded in the presence (100 pM) and in the absence of microRNA-39. The detection limit was calculated using  $3\sigma$  rule.

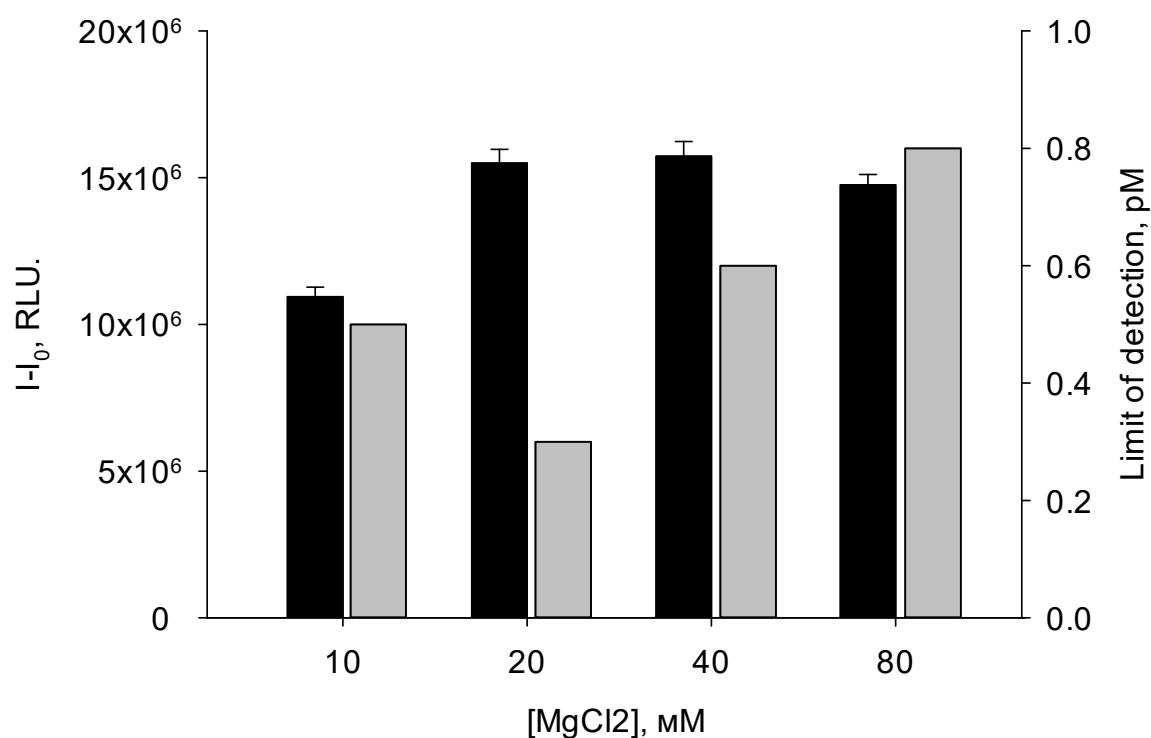

**Figure S3.** Effect of the  $\text{MgCl}_2$  concentration in the reaction solution at the stage of mCHA amplification on (A) behavior of the calibration curves constructed, (B) chemiluminescence signal ( $I - I_0$ ) (black columns) and limit of detection (gray columns) of amplified microRNA-39 assay. The mismatched catalytic hairpin assembly reaction was carried out at  $25^\circ\text{C}$  for 1 h using 160 nM B-HP2 probe in 10 mM Tris-HCl with pH 7.2 containing  $\text{MgCl}_2$  concentrations of (a) 10, (b) 20, (c) 40 and (d) 80 mM. The value of chemiluminescence signal ( $I - I_0$ ) was calculated as the difference between the chemiluminescence intensities recorded in the presence (100 pM) and in the absence of the microRNA-39. The detection limit was calculated based on  $3\sigma$  rule.

## Analytical Parameters of Heterogenous mCHA-Based MicroRNA-39 Assay

With the use of estimated favorable conditions calibration curve for microRNA-39 detection was obtained (Fig. 4). It is obeyed following equation:

$$Y = \frac{ax}{b+x} + \frac{cx}{d+x} (R^2 0.9976),$$

where  $a$ ,  $b$ ,  $c$ ,  $d$  is  $5.03 \times 10^6$ , 6.5,  $6.3 \times 10^{14}$ ,  $5.8 \times 10^9$ , respectively. The limit of microRNA-39 detection calculated by  $3\sigma$  rule was 300 fM. The coefficient of variation of chemiluminescent signal (CV) formed upon the heterogeneous mCHA-based miRNA-39 assay within the working range was less than 11%.

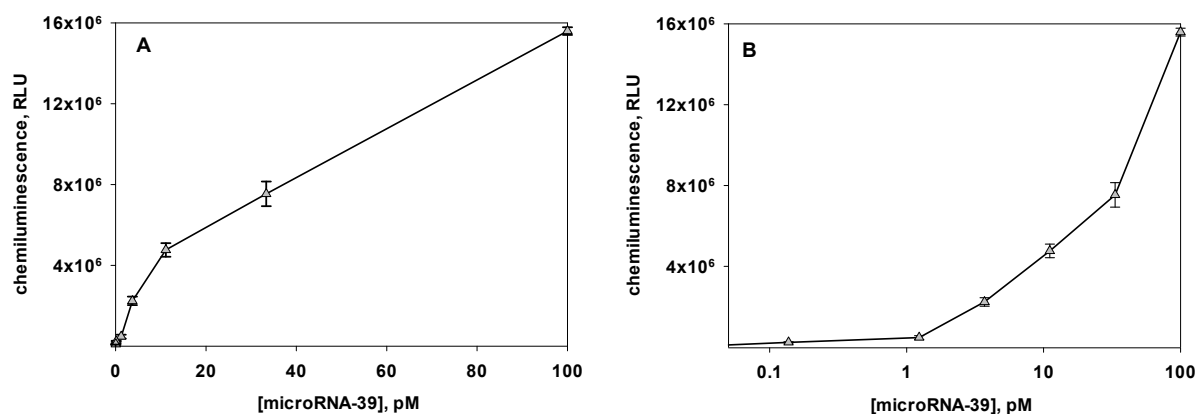

**Figure S4.** Calibration curve for the determination of microRNA-39 by chemiluminescent heterogenous assay based on mismatched catalytic hairpin assembly reaction ( $n = 6$ ) presented in (A) linear and (B) semi-logarithmic coordinates. The mCHA reaction was carried out using 160 nM B-HP2 in 10 mM Tris-HCl with pH 7.2 containing 20 mM MgCl<sub>2</sub> at 25°C for 1 h.

### Specificity of the Heterogeneous Chemiluminescent Assay of MicroRNA-39

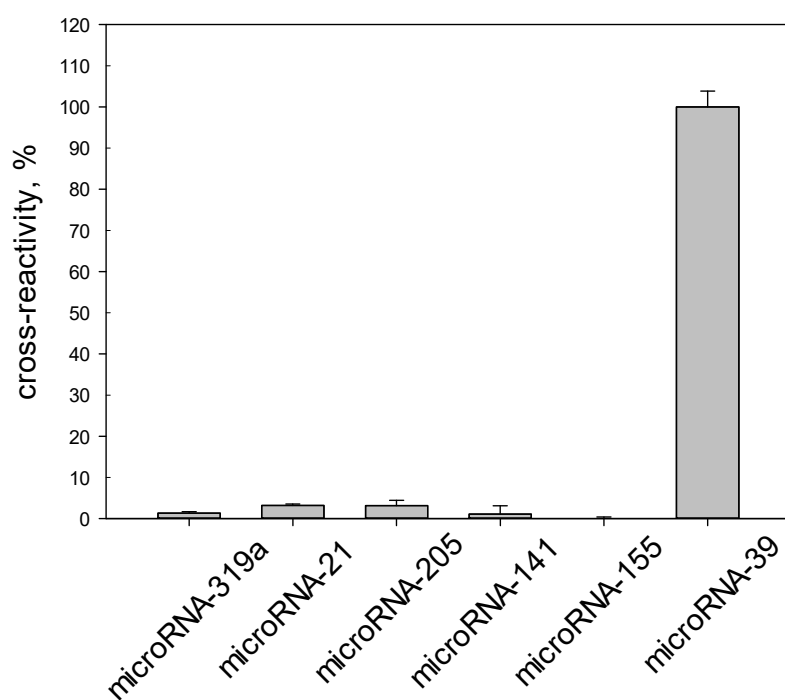

**Figure S5.** Specificity of the chemiluminescence heterogeneous method for the determination of microRNA-39 based on mismatched catalytic hairpin assembly reaction ( $n = 3$ ). The concentration of the studied miRNAs was 100 pM.
